# Supplementary material
Source: publisher figshare collection journal article supplement (https://frontiersin.figshare.com/ndownloader/files/12854774)
Supplement: Supplementary file [file 12854774]

## *Supplementary Material*

### **Transcriptomic characterization of a chicken embryo model infected with duck hepatitis A virus type 1**

**Jinyan Xie<sup>1,2¶</sup>, Qiurui Zeng<sup>4¶</sup>, Mingshu Wang<sup>1,2,3¶</sup>, Xumin Ou<sup>1,2¶</sup>, Yunchao Ma<sup>1,2</sup>,  
Anchun Cheng<sup>1,2,3\*</sup>, Xin-Xin Zhao<sup>1,2,3</sup>, Mafeng Liu<sup>1,2,3</sup>, Dekang Zhu<sup>2,3</sup>, Shun  
Chen<sup>1,2,3</sup>, Renyong Jia<sup>1,2,3</sup>, Qiao Yang<sup>1,2,3</sup>, Ying Wu<sup>1,2,3</sup>, Shaqiu Zhang<sup>1,2,3</sup>, Yunya  
Liu<sup>1,2,3</sup>, Yanling Yu<sup>1,2,3</sup>, Ling Zhang<sup>1,2,3</sup>, Xiaoyue Chen<sup>1,2,3</sup>**

Corresponding authors: Anchun Cheng, [chenganchun@vip.163.com](mailto:chenganchun@vip.163.com)

Supplementary Figures and Tables

A

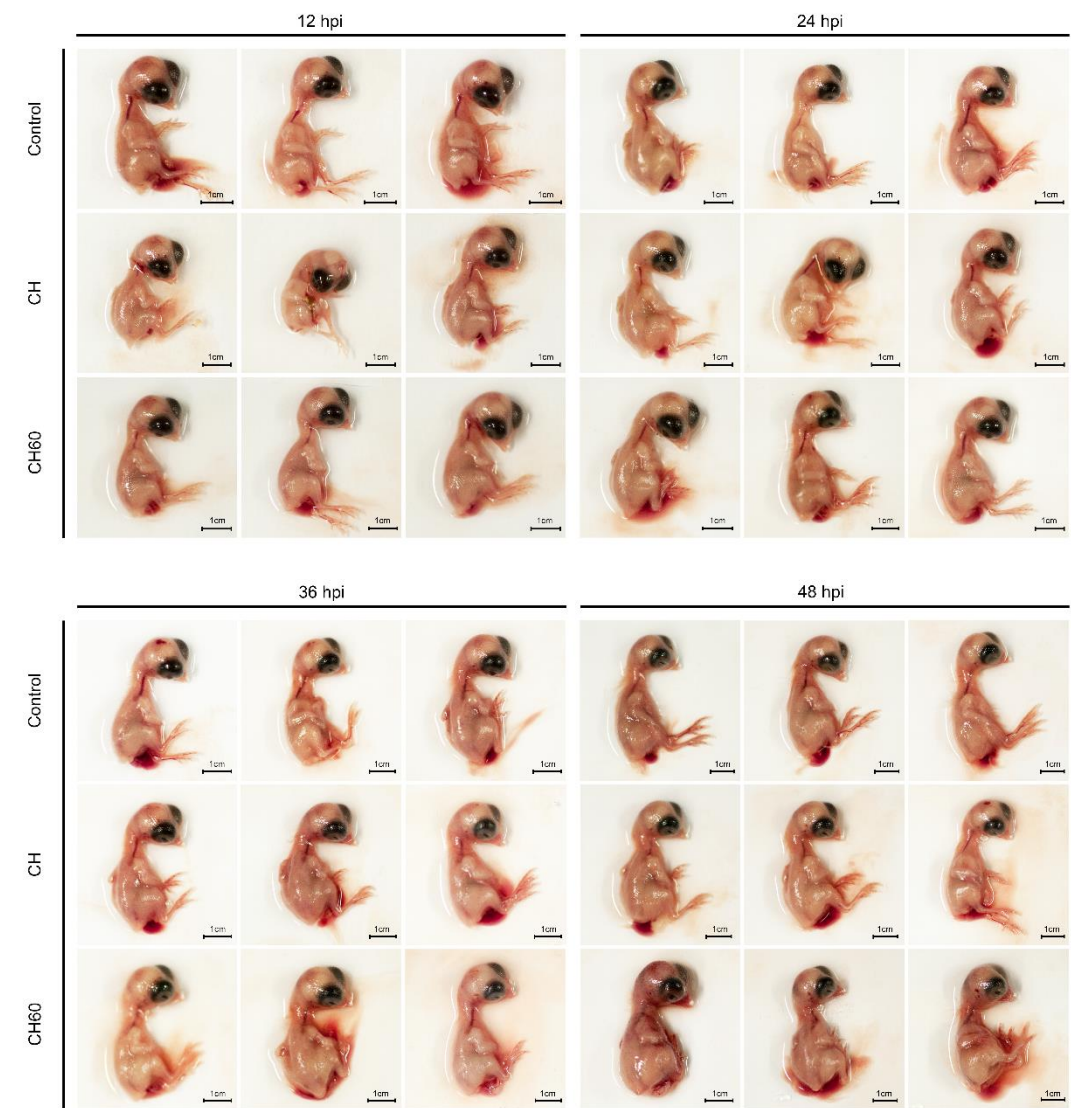

B

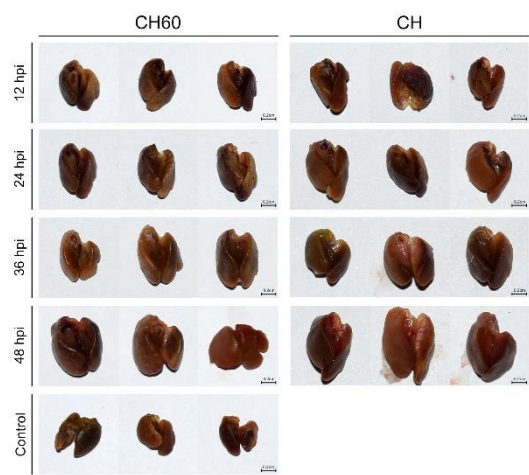

**Supplementary Figure 1.** Gross lesions and histopathological lesions in the CH- or CH60-infected livers of all chicken embryos. The chicken embryos were infected with the CH or CH60 strain (A), and then, the livers were collected and soaked in 4% paraformaldehyde solution at 12, 24, 36 and 48 hpi (B).

A

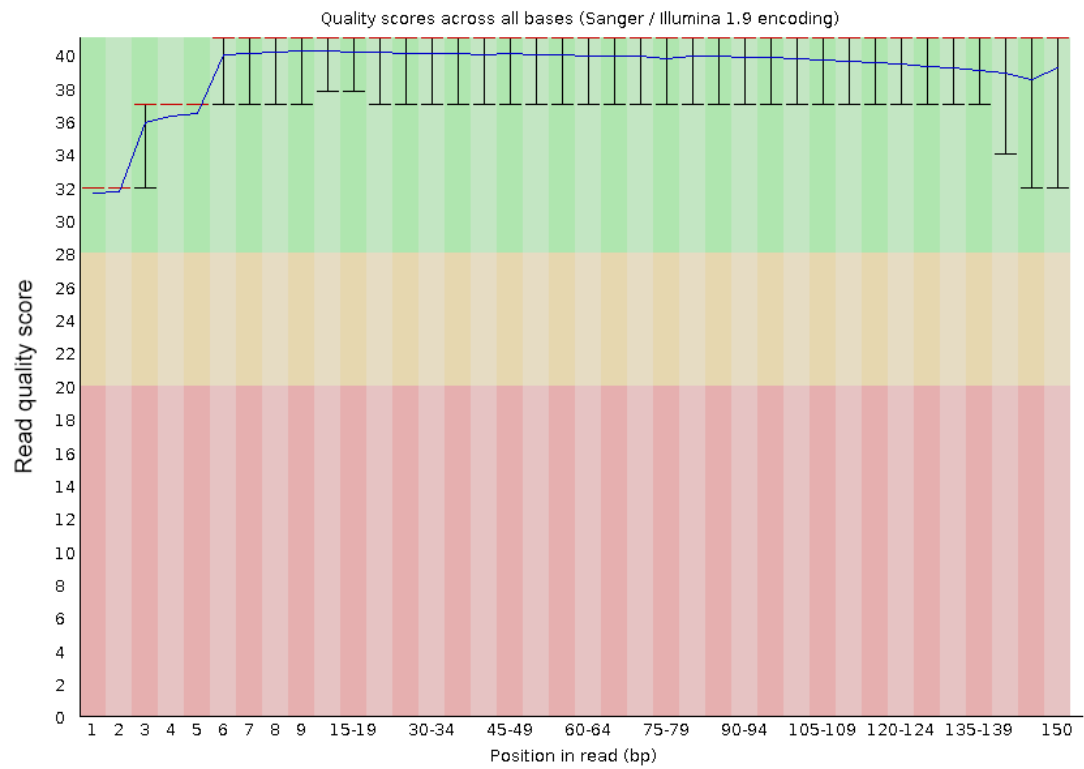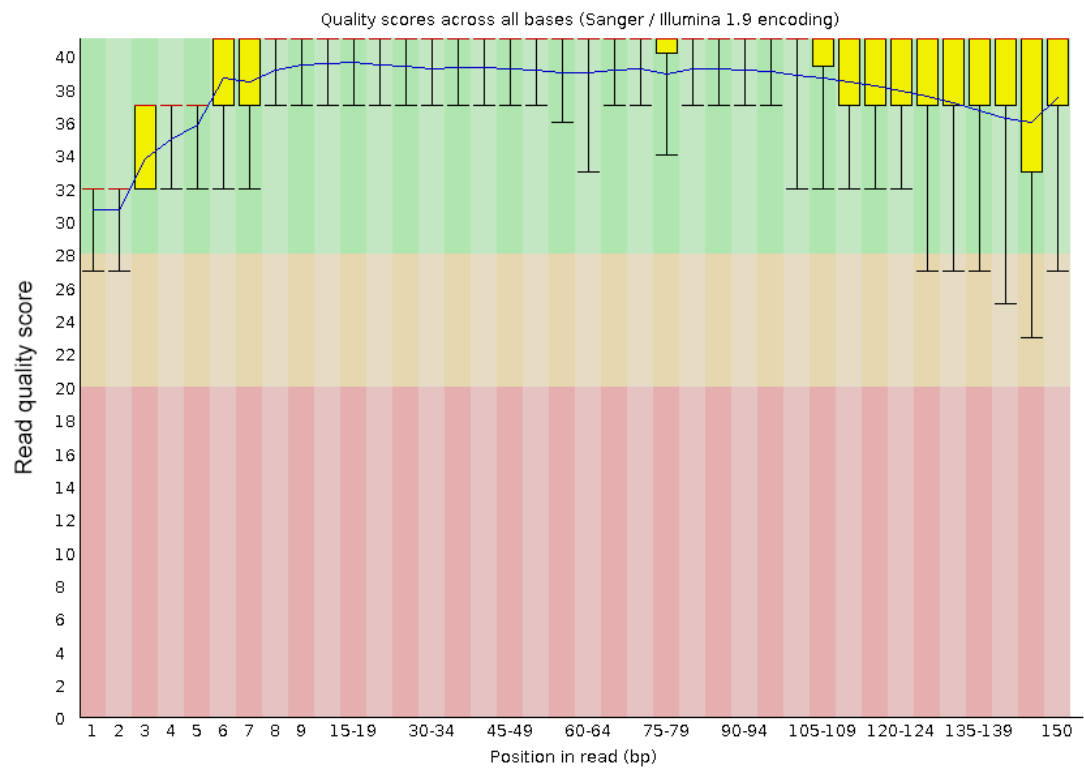

B

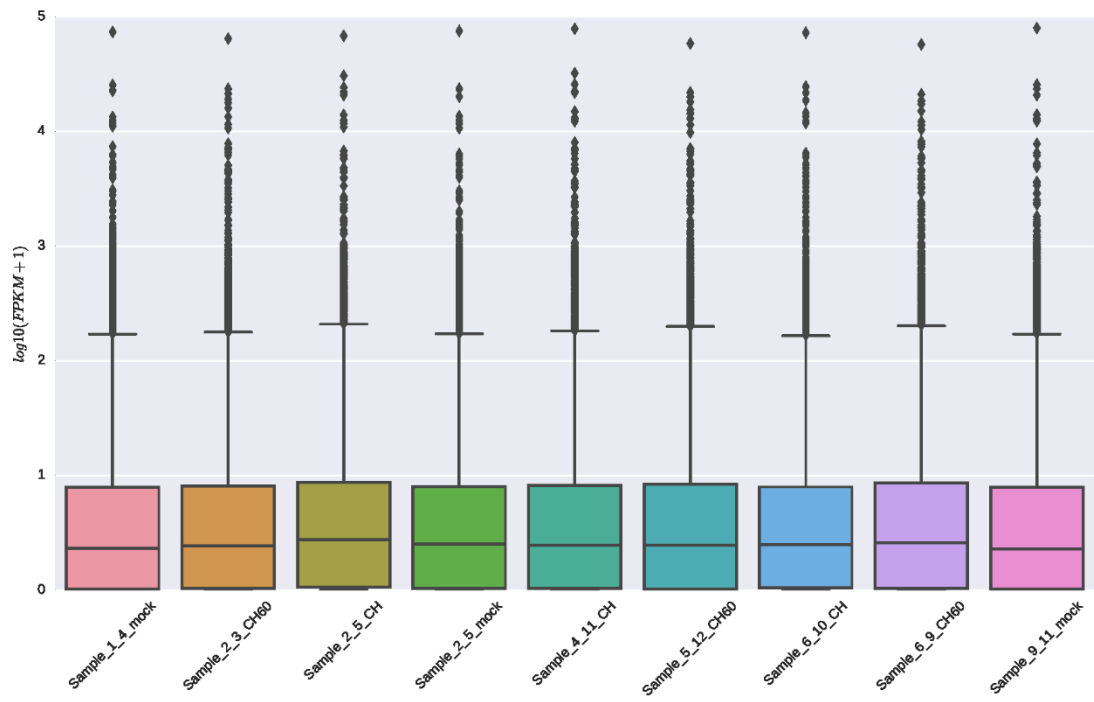

C

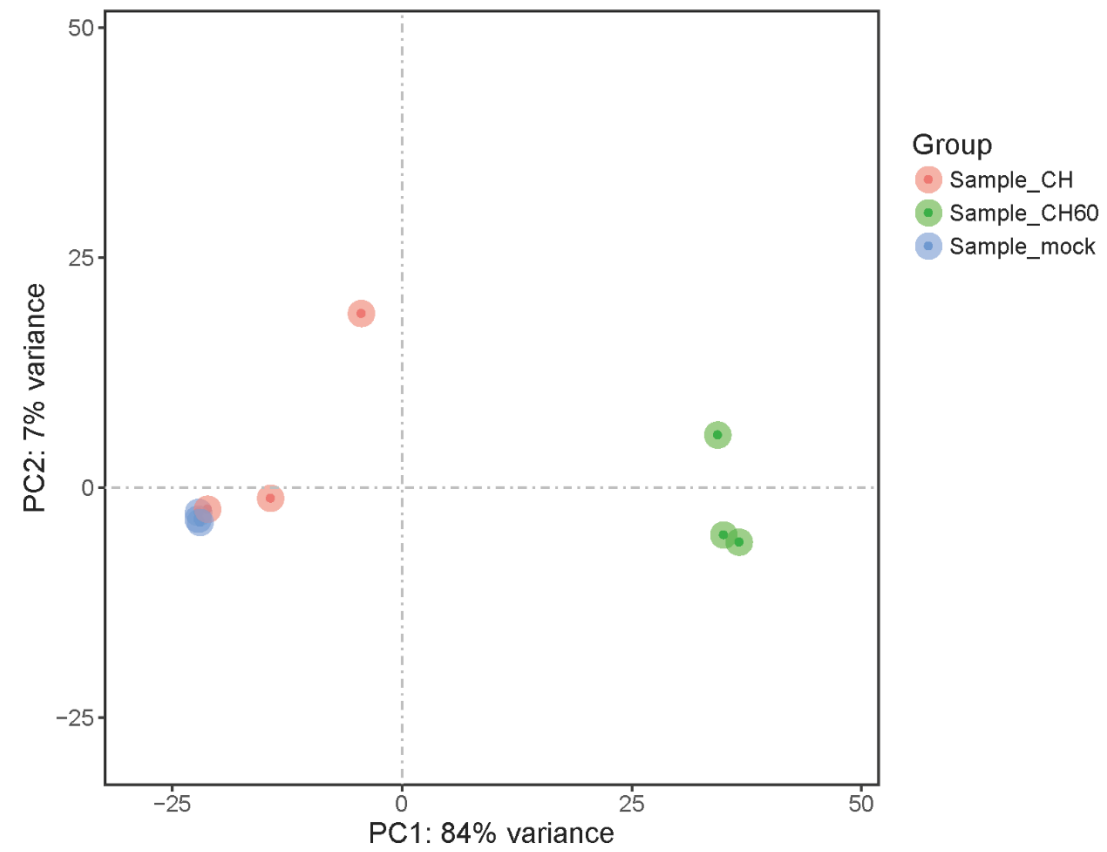

D

| Sample                                                       | mock             | CH                | CH60             |
|--------------------------------------------------------------|------------------|-------------------|------------------|
| Total reads;<br>means of 3<br>biological<br>replicates. (SD) | 48623617(523872) | 46896623(2145679) | 48234173(862819) |

**Supplementary Figure 2.** Quality control analyses and total reads data. (A) A raw data quality analysis across all bases. top graph for forward reads, the bottom graph reverse reads. The analysis was determined using the FastQC program (<http://www.bioinformatics.babraham.ac.uk/projects/fastqc/>) (v 0.11.5). The vast majority of reads were of high quality (green zone). The figure was representative of forward and reverse reads for all 9 sequencing samples. (B) Box-whisker Plot for all 9 sequencing samples. The abscissa represents the experimental conditions, and the ordinate represents the logarithm of FPKM+1. (C) PCA plot. PCA shows the relationship between samples from different dimensions. (D) total reads of three groups.

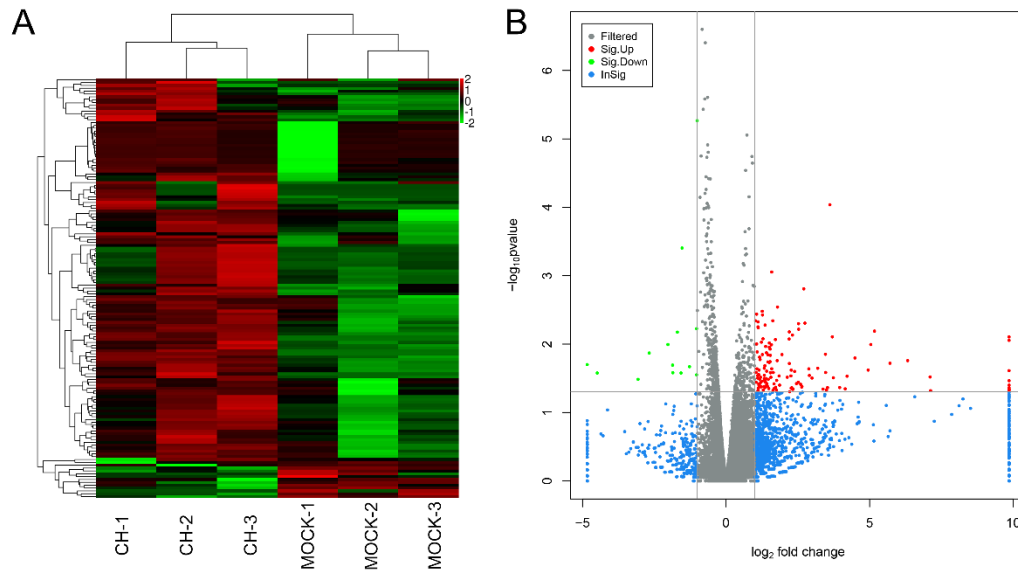

**Supplementary Figure 3.** Analysis of DEGs of the mock and CH groups ( $p\text{-value} < 0.05$  and  $\text{fold change} > 2$ ). A heatmap was used to classify the gene expression patterns, and a volcano plot displayed the number of DEGs. (A) X-axis represents the experimental conditions. (B) Volcano plot of DEGs between the CH and mock groups. Y-axis indicates the negative logarithm of the p-value; X-axis indicates the base 2 logarithm of fold change.

A

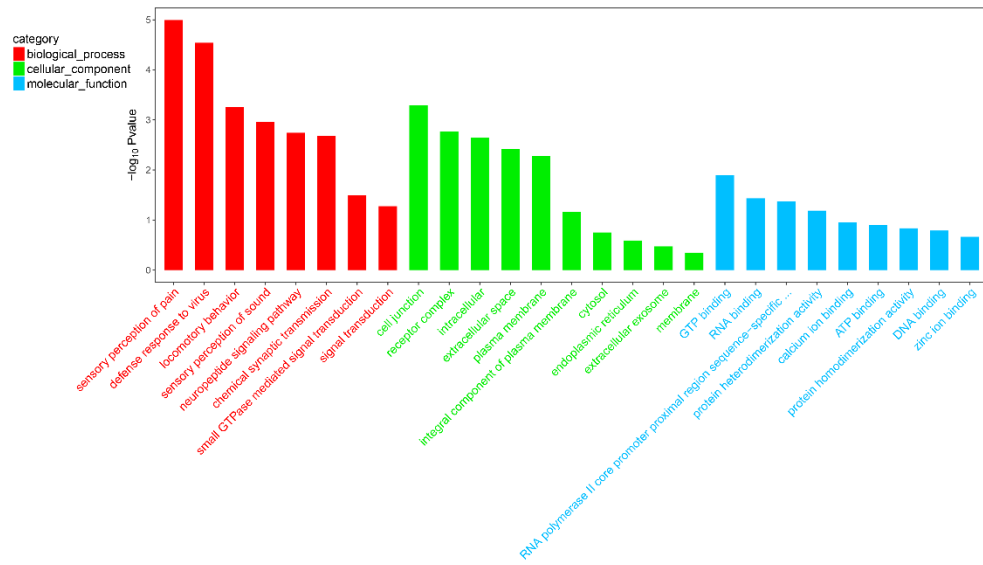

B

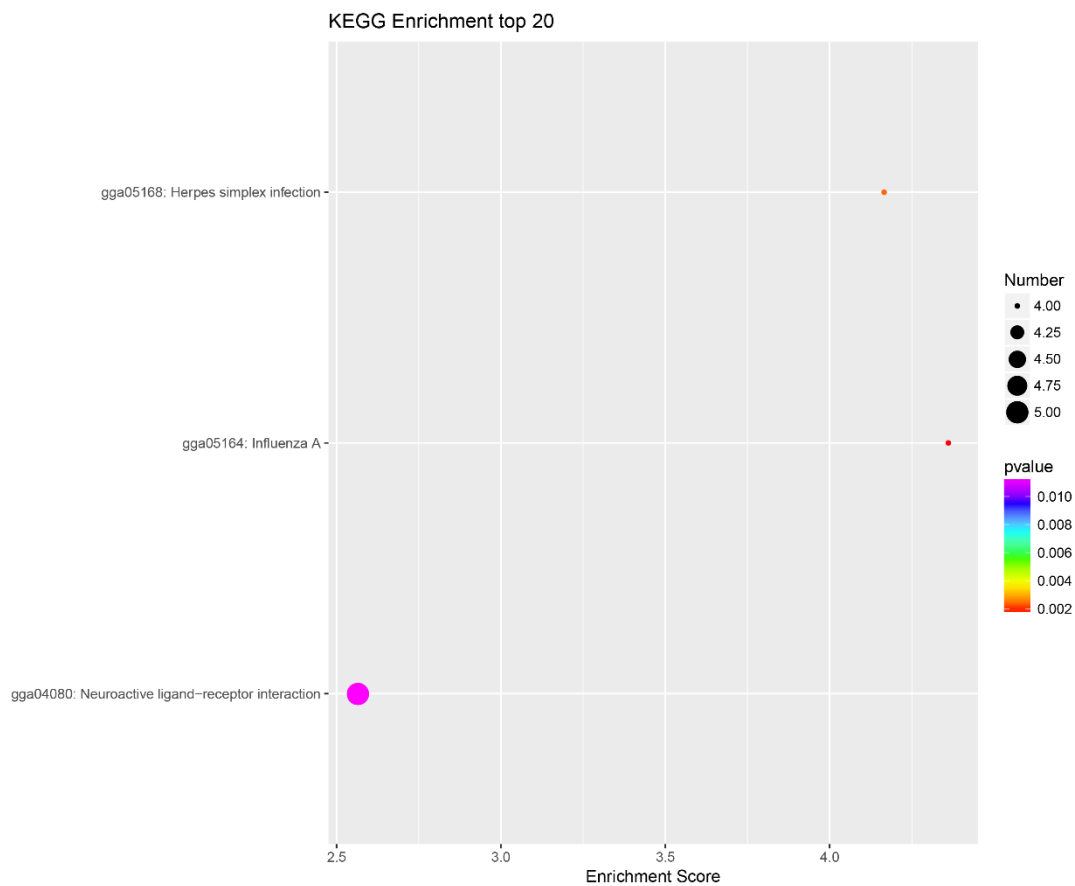

**Supplementary Figure 4.** GO enrichment (A) and KEGG enrichment (B) analysis of DEGs between the mock group and CH group ( $p$ -value $<0.05$  and fold change $>2$ ). (A) The categories are assigned to the x-axis, and the negative logarithm of the adjusted  $p$ -value is assigned to the y-axis. (B) Circles represent KEGG enrichment analyses of the



DEGs between the mock and CH groups. The colors of the circles indicate p-value; the sizes indicate the number of genes assigned to the term.

## A tryptophan metabolism

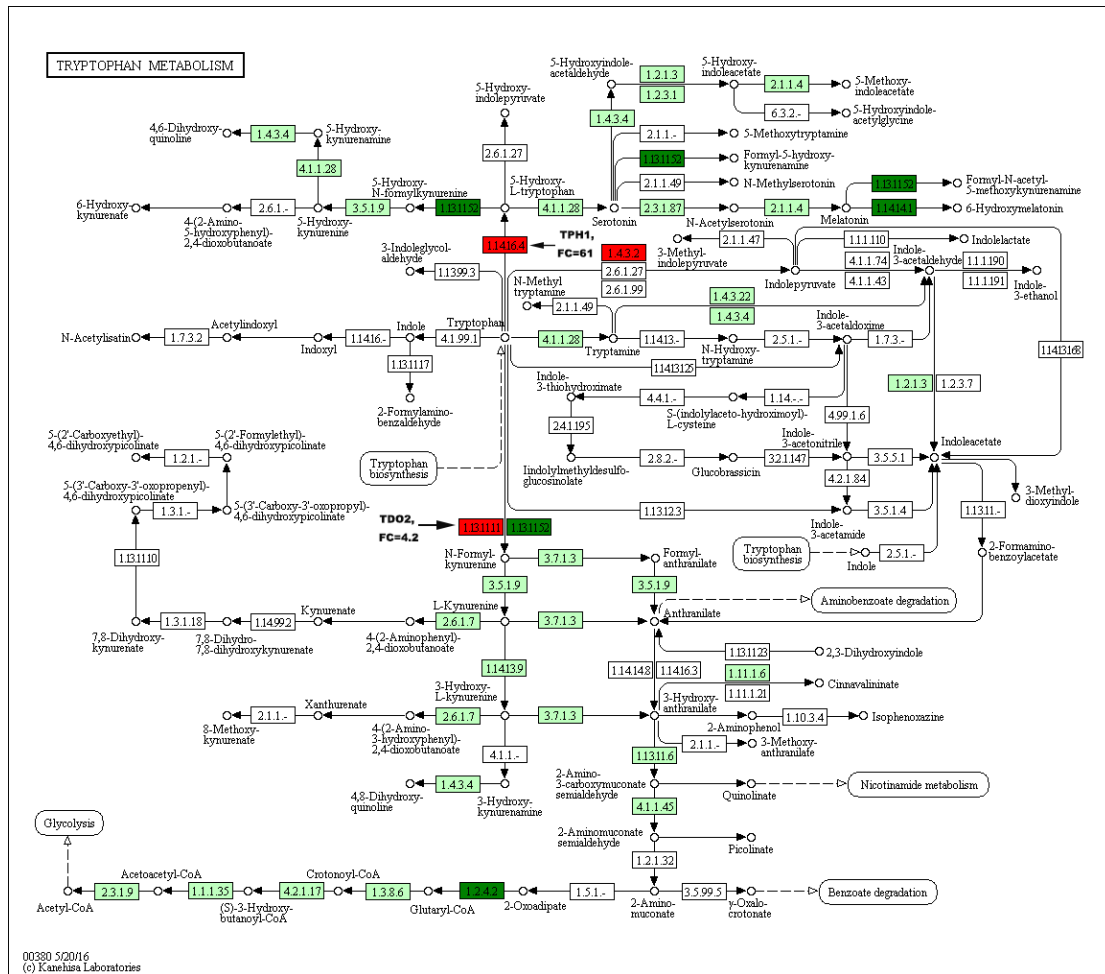

## B fatty acid biosynthesis

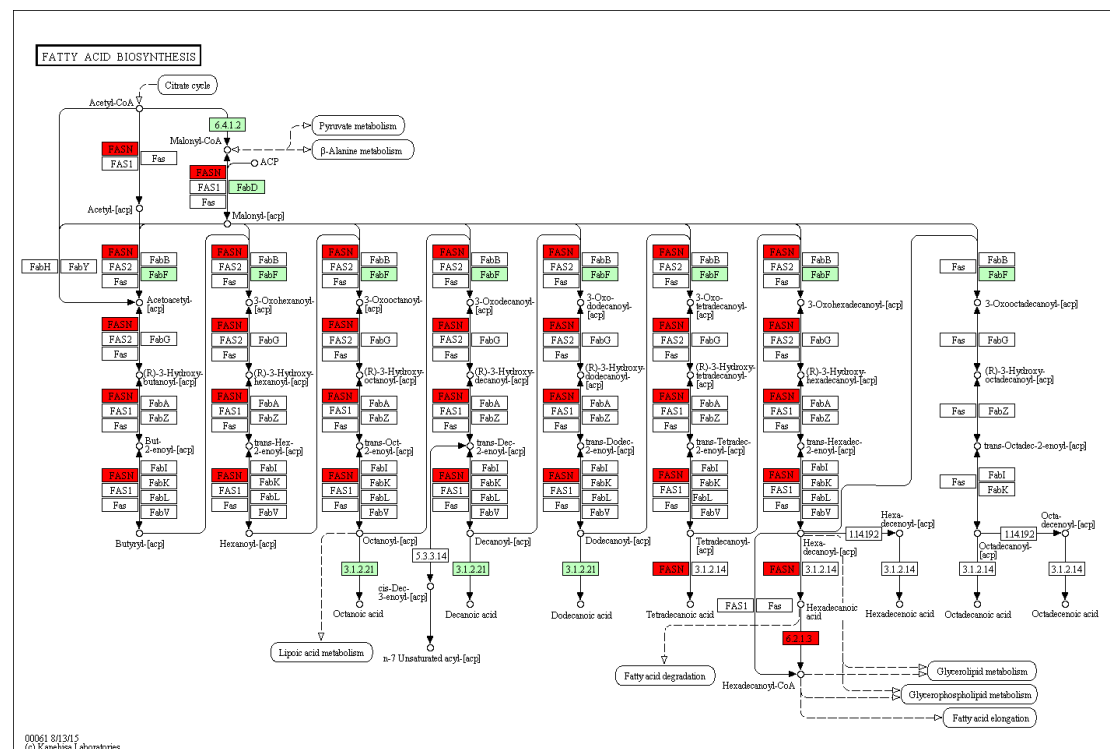

## C phagosome

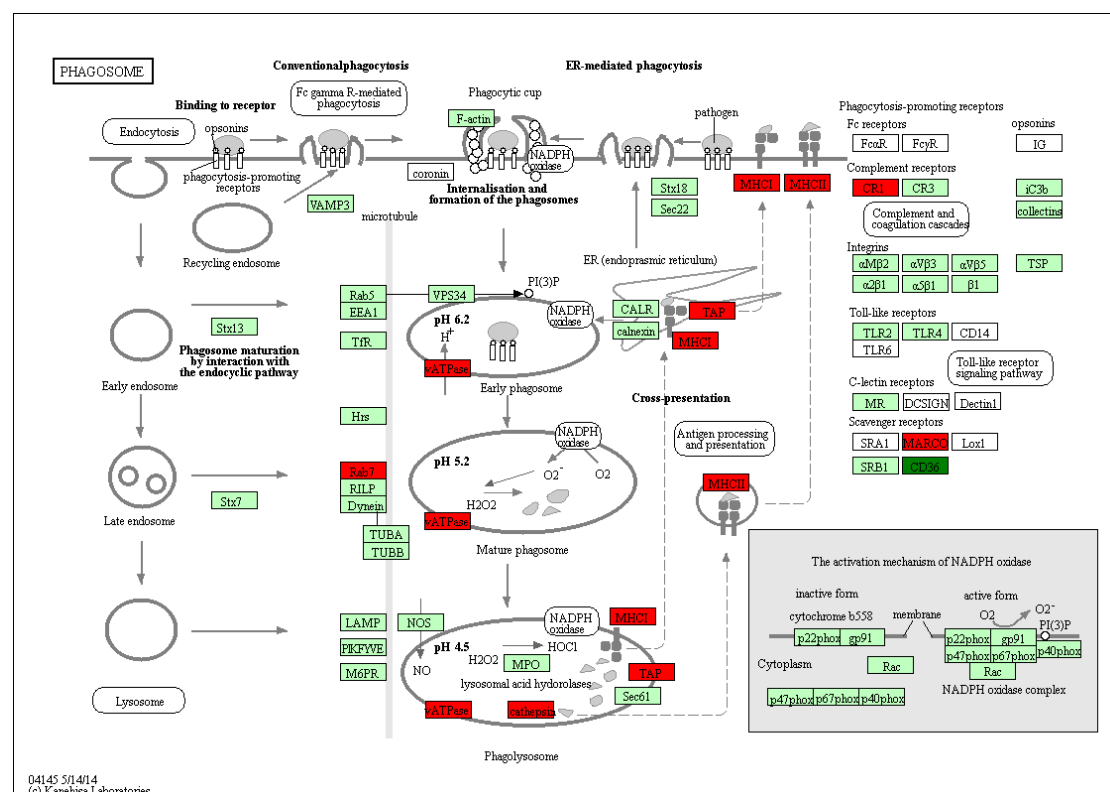

**Supplementary Figure 5.** The metabolic pathway in the process of CH60 infection.

The red represented up-regulated and green represented down-regulated. (A) was the tryptophan metabolism. (B) was the fatty acid biosynthesis. (C) was the pathway of

phagosome

**Supplementary Table 1.** Sequences of primers used for gene expression profiling.

| Gene          | Forward (5'-3')      | Reverse (5'-3')        |
|---------------|----------------------|------------------------|
| IFN- $\alpha$ | TCGCAACCTTCACCTCACC  | CGCAGGCGCTGTAATCGT     |
| IFN- $\beta$  | TCCAGCTCCTTCAGAATACG | TGCGGTCAATCCAGTGTT     |
| IFN- $\gamma$ | TCATACTGAGCCAGATTGT  | AAGTCGTTTCATCGGGAGC    |
| TLR3          | TGGCTAAACGACACTCAA   | AGCTATTCTCCACCCTTC     |
| TLR7          | GACCCTGACTATTAACCAT  | CGTAAAGTAGCAGGAAGAC    |
| IL-6          | GAAATCCCTCCTCGCCAATC | CCCTCACGGTCTTCTCCATAAA |
| IL-10         | CAATCCAGGGACGATGAAC  | GCAGGTGAAGAAGCGGTGA    |
| SOCS1         | GCACGCACTTCCGAACCT   | ACACTGATGGCAAAGAAACAA  |
| SOCS3         | CGGCACTTCTTCACCCTCAG | CAGCTTCAGCACGCAGTCG    |
| STAT1         | GTAAAGAGGGAGCAATCA   | TATCAGGGAAAGTAACAGC    |
| STAT3         | AAGCGTGGTCTCAGCATT   | TGATTGACAGCCCGAGTAG    |
| IRF1          | GGATGCTCCACCTCTG     | GTGCTGGTTAGTCGTTCTG    |
| IRF7          | AAAGCCCAAGGAGTCCAAGC | GCTGACGTTGCCACTGTTGA   |
| GAPDH         | TGAAAGTCGGAGTCAACGG  | GGTCACGCTCCTGGAAGAT    |
